# Supplementary material
Source: PubMed Central journal article supplement (PMC10235101)
Supplement: 41422_2023_802_MOESM1_ESM.pdf [file 41422_2023_802_MOESM1_ESM.pdf]

# Supplementary information, Fig. S1

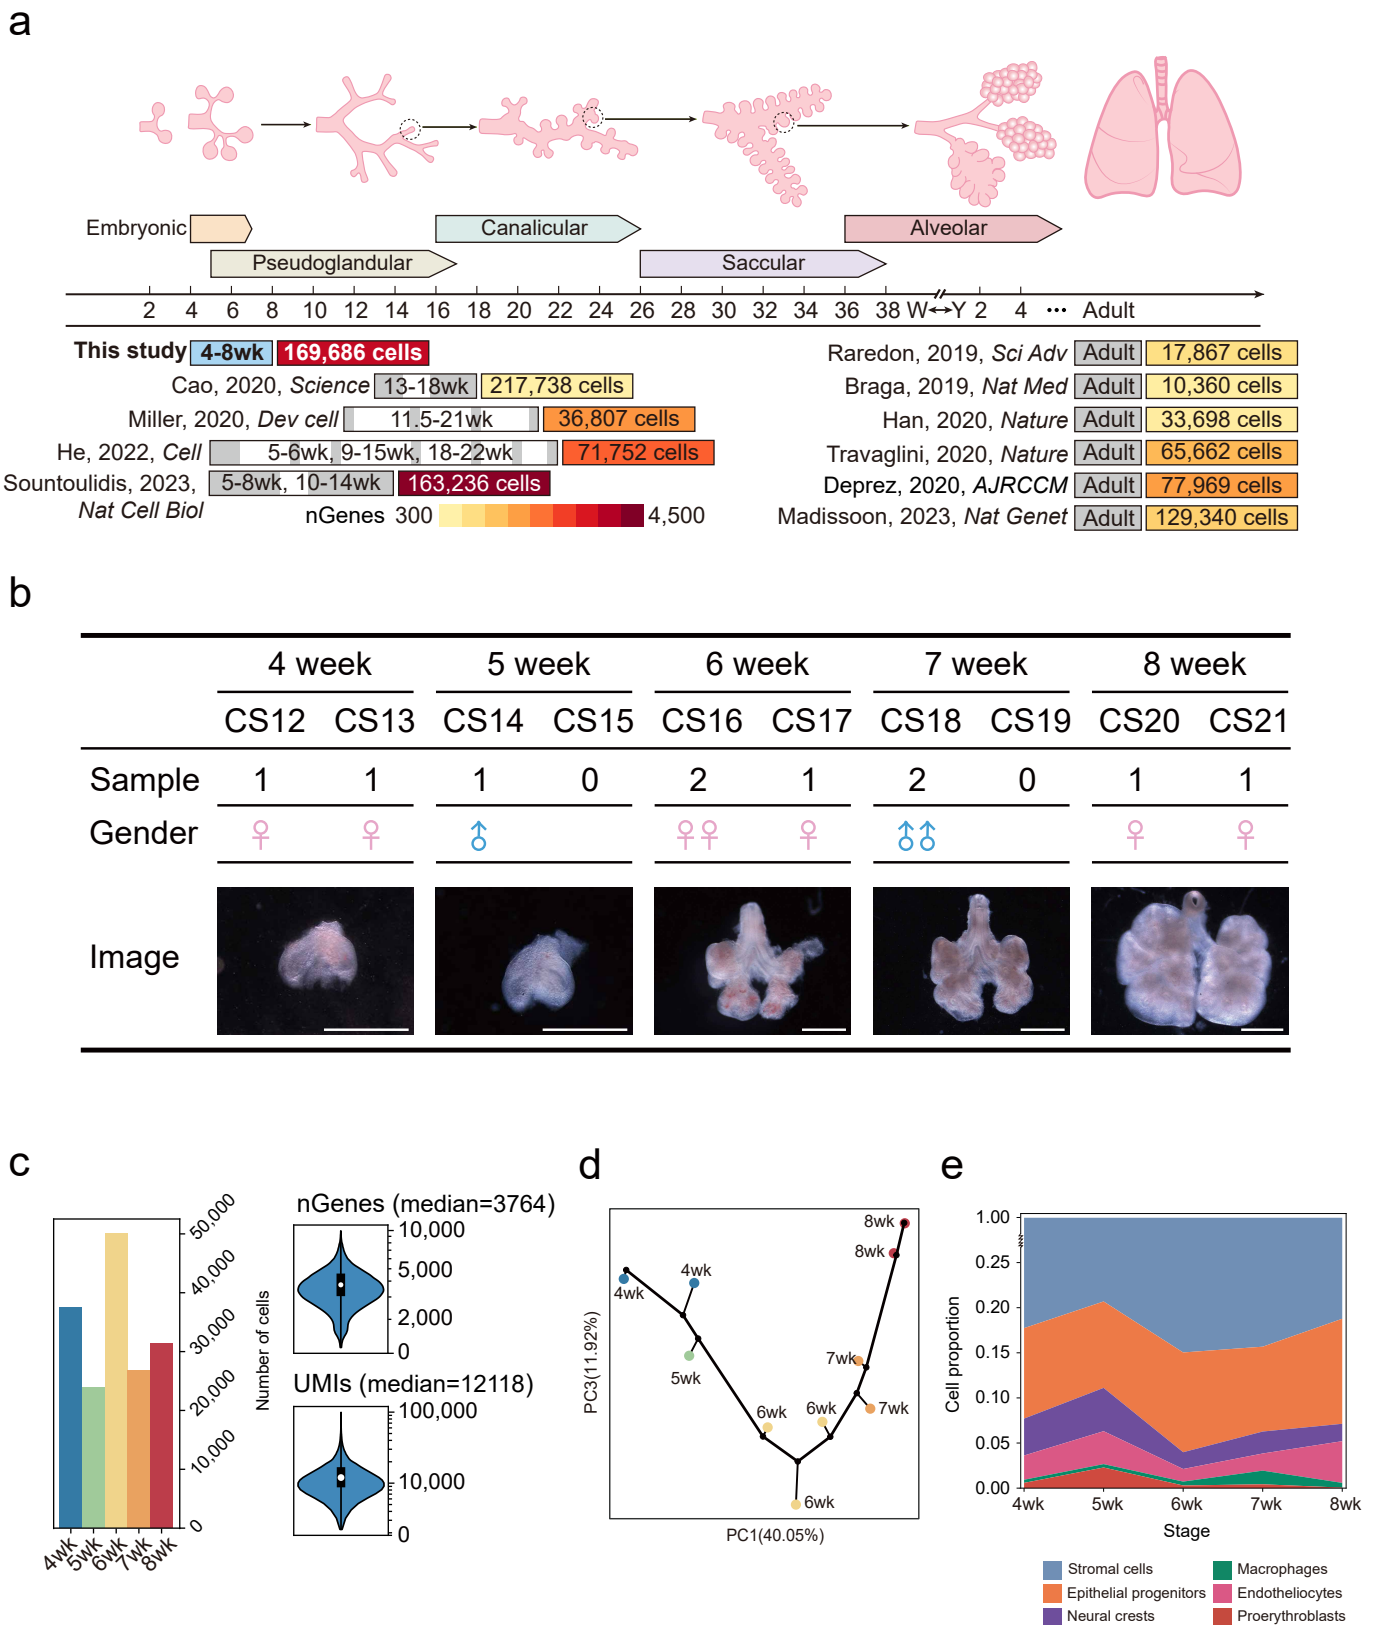

**Fig. S1 Tissue images and data quality.**

**(a)** Comparison of single cell studies for human lung development.

**(b)** Representative human embryonic lung image, Carnegie stage, and sample size of scRNA-seq experiments. Scale bar, 1mm.

**(c)** Histograms showing the number of cells sequenced at each timepoint. The distribution of detected genes (nGenes) and counts (UMIs) across all samples were shown in violin plots.

**(d)** PCA of pseudo-bulk RNA-seq profiles demonstrating a concordance collection time of samples along the PC components.

**(e)** Stack plot showing the proportion of cell types over time.
