# Supplementary material
Source: PubMed Central journal article supplement (PMC10235101)
Supplement: 41422_2023_802_MOESM2_ESM.pdf [file 41422_2023_802_MOESM2_ESM.pdf]

# Supplementary information, Fig. S2

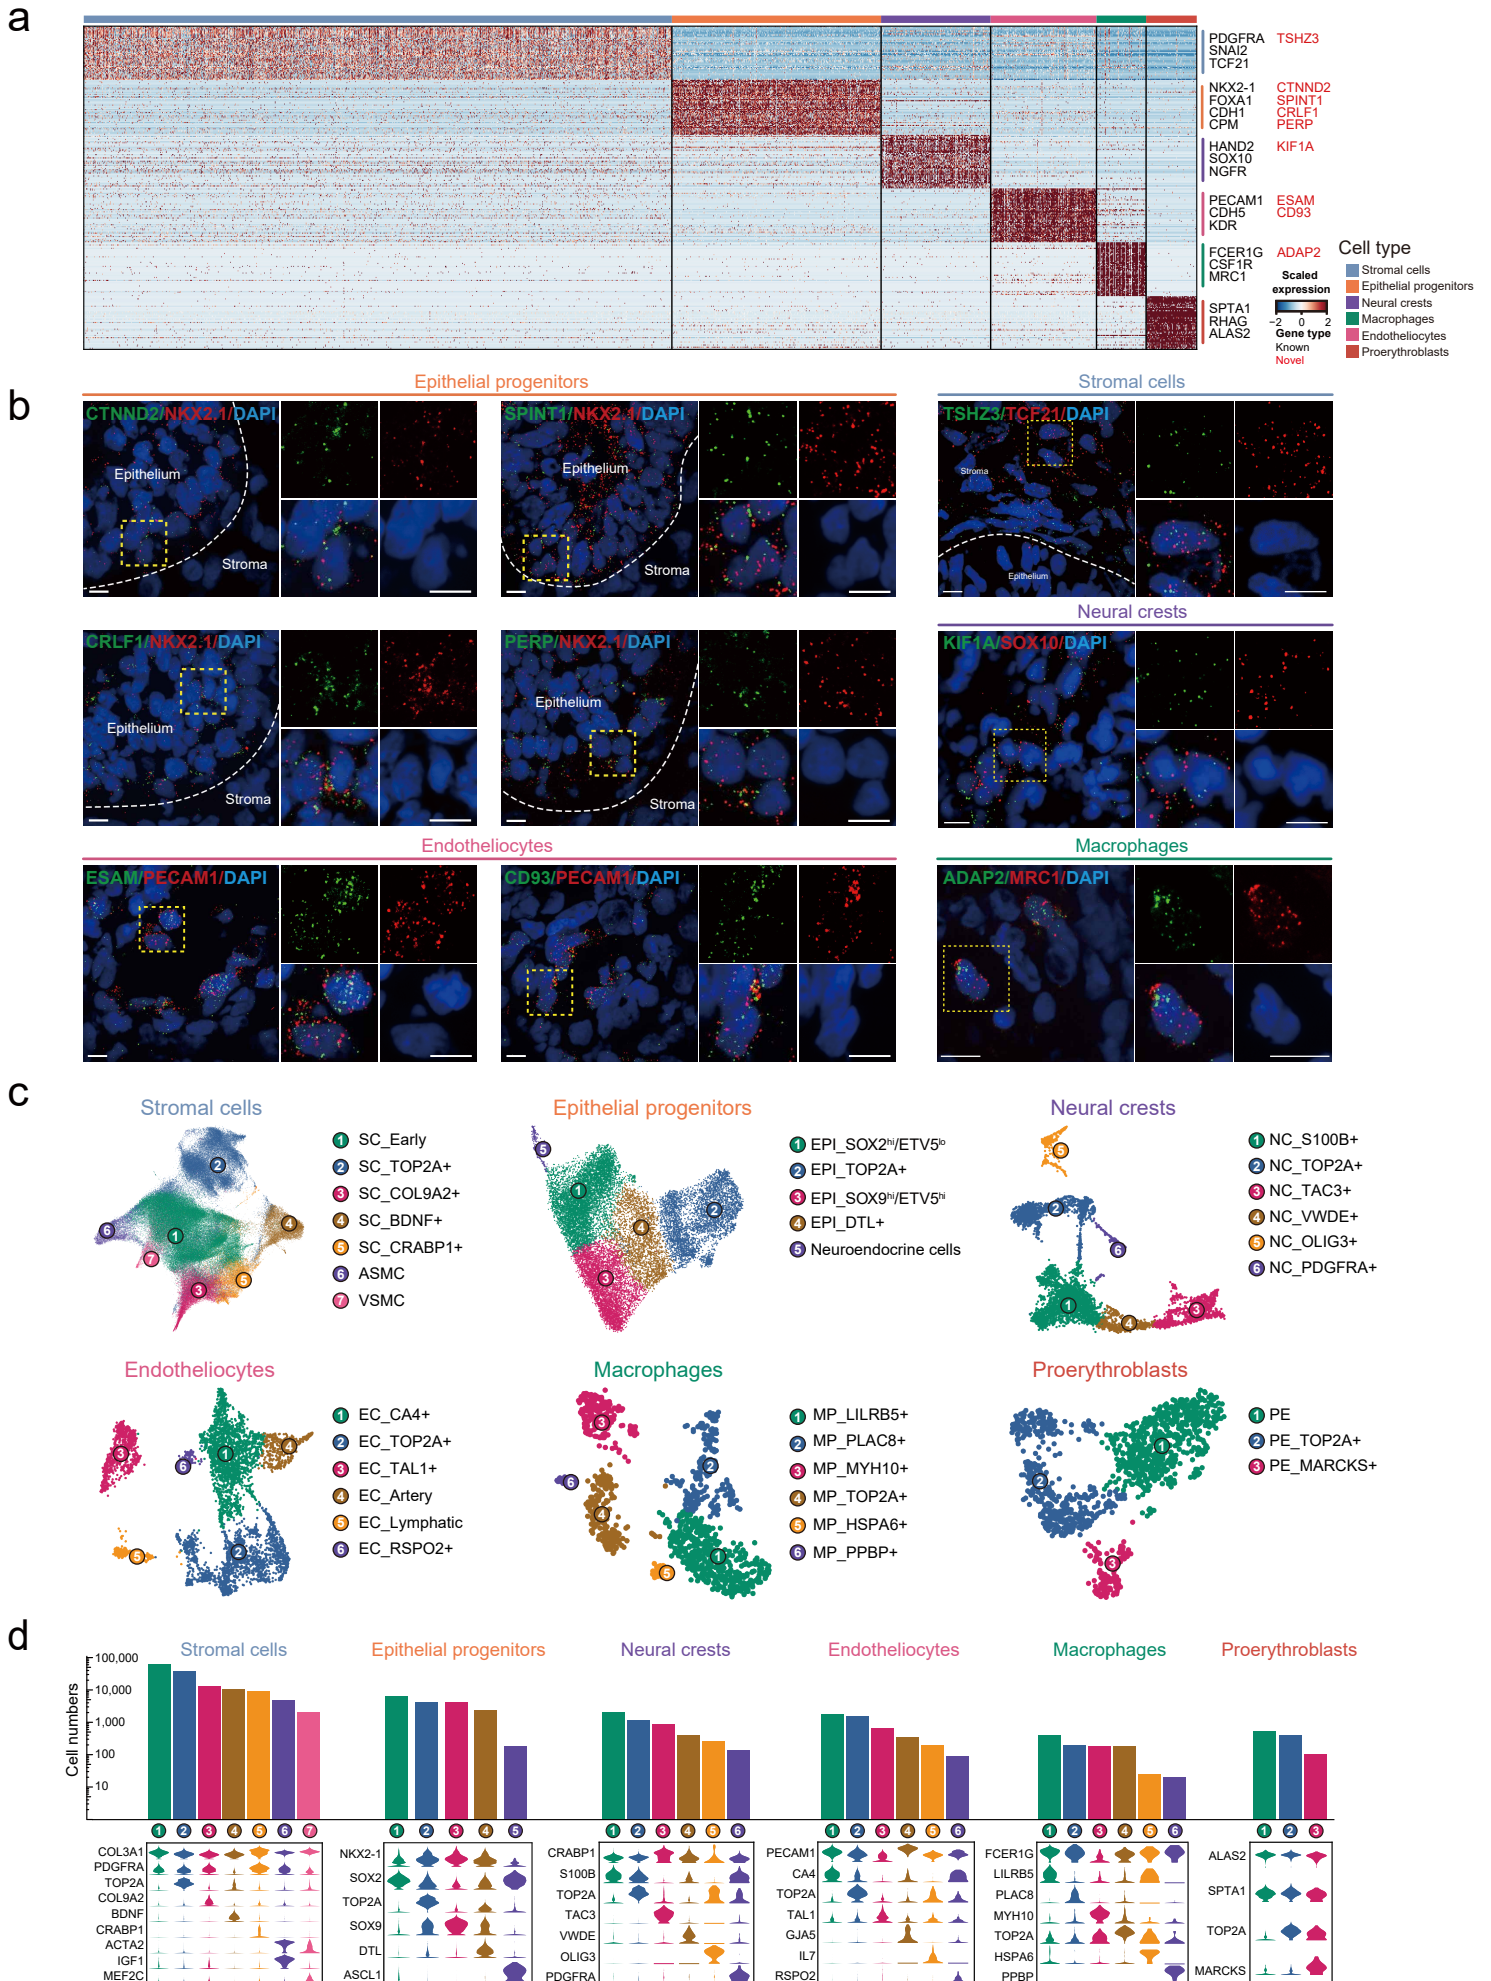

## **Fig. S2 Human embryonic lung cell atlas.**

**(a)** Heatmap showed scaled expression of differentially expressed genes (DEGs) among six major cell types ( $p$ -value $<0.01$ , Wilcoxon rank-sum test). Genes marked in black are the known cell type markers, in red are the newly identified markers in this study.

**(b)** smiFISH staining in 8 weeks' lung tissue showing epithelial (i.e., *NKX2-1*, *CTNND2*, *SPINT1*, *CRLF1*, *PERP*), stromal (i.e., *TSHZ3*, *TCF21*), neural crest (i.e., *KIF1A*, *SOX10*), endothelial (i.e., *ESAM*, *PECAM1*), and macrophage (i.e., *ADAP2*, *MRC1*) markers. Data are representative of at least two independent smiFISH experiments. Scale bar, 10 $\mu$ m.

**(c)** Further clustering of the six major cell types, yielding 33 cell subtypes. Cell subtypes of each major cell types are projected on UMAP layout, respectively.

**(d)** Bar plot showing the log<sub>10</sub>-transformed cell number of 33 cell subtypes (upper). Violin plot showing the distribution of shared and specific markers of these cell subtypes (lower).
