# Supplementary material
Source: PubMed Central journal article supplement (PMC10235101)
Supplement: 41422_2023_802_MOESM4_ESM.pdf [file 41422_2023_802_MOESM4_ESM.pdf]

# Supplementary information, Fig. S4

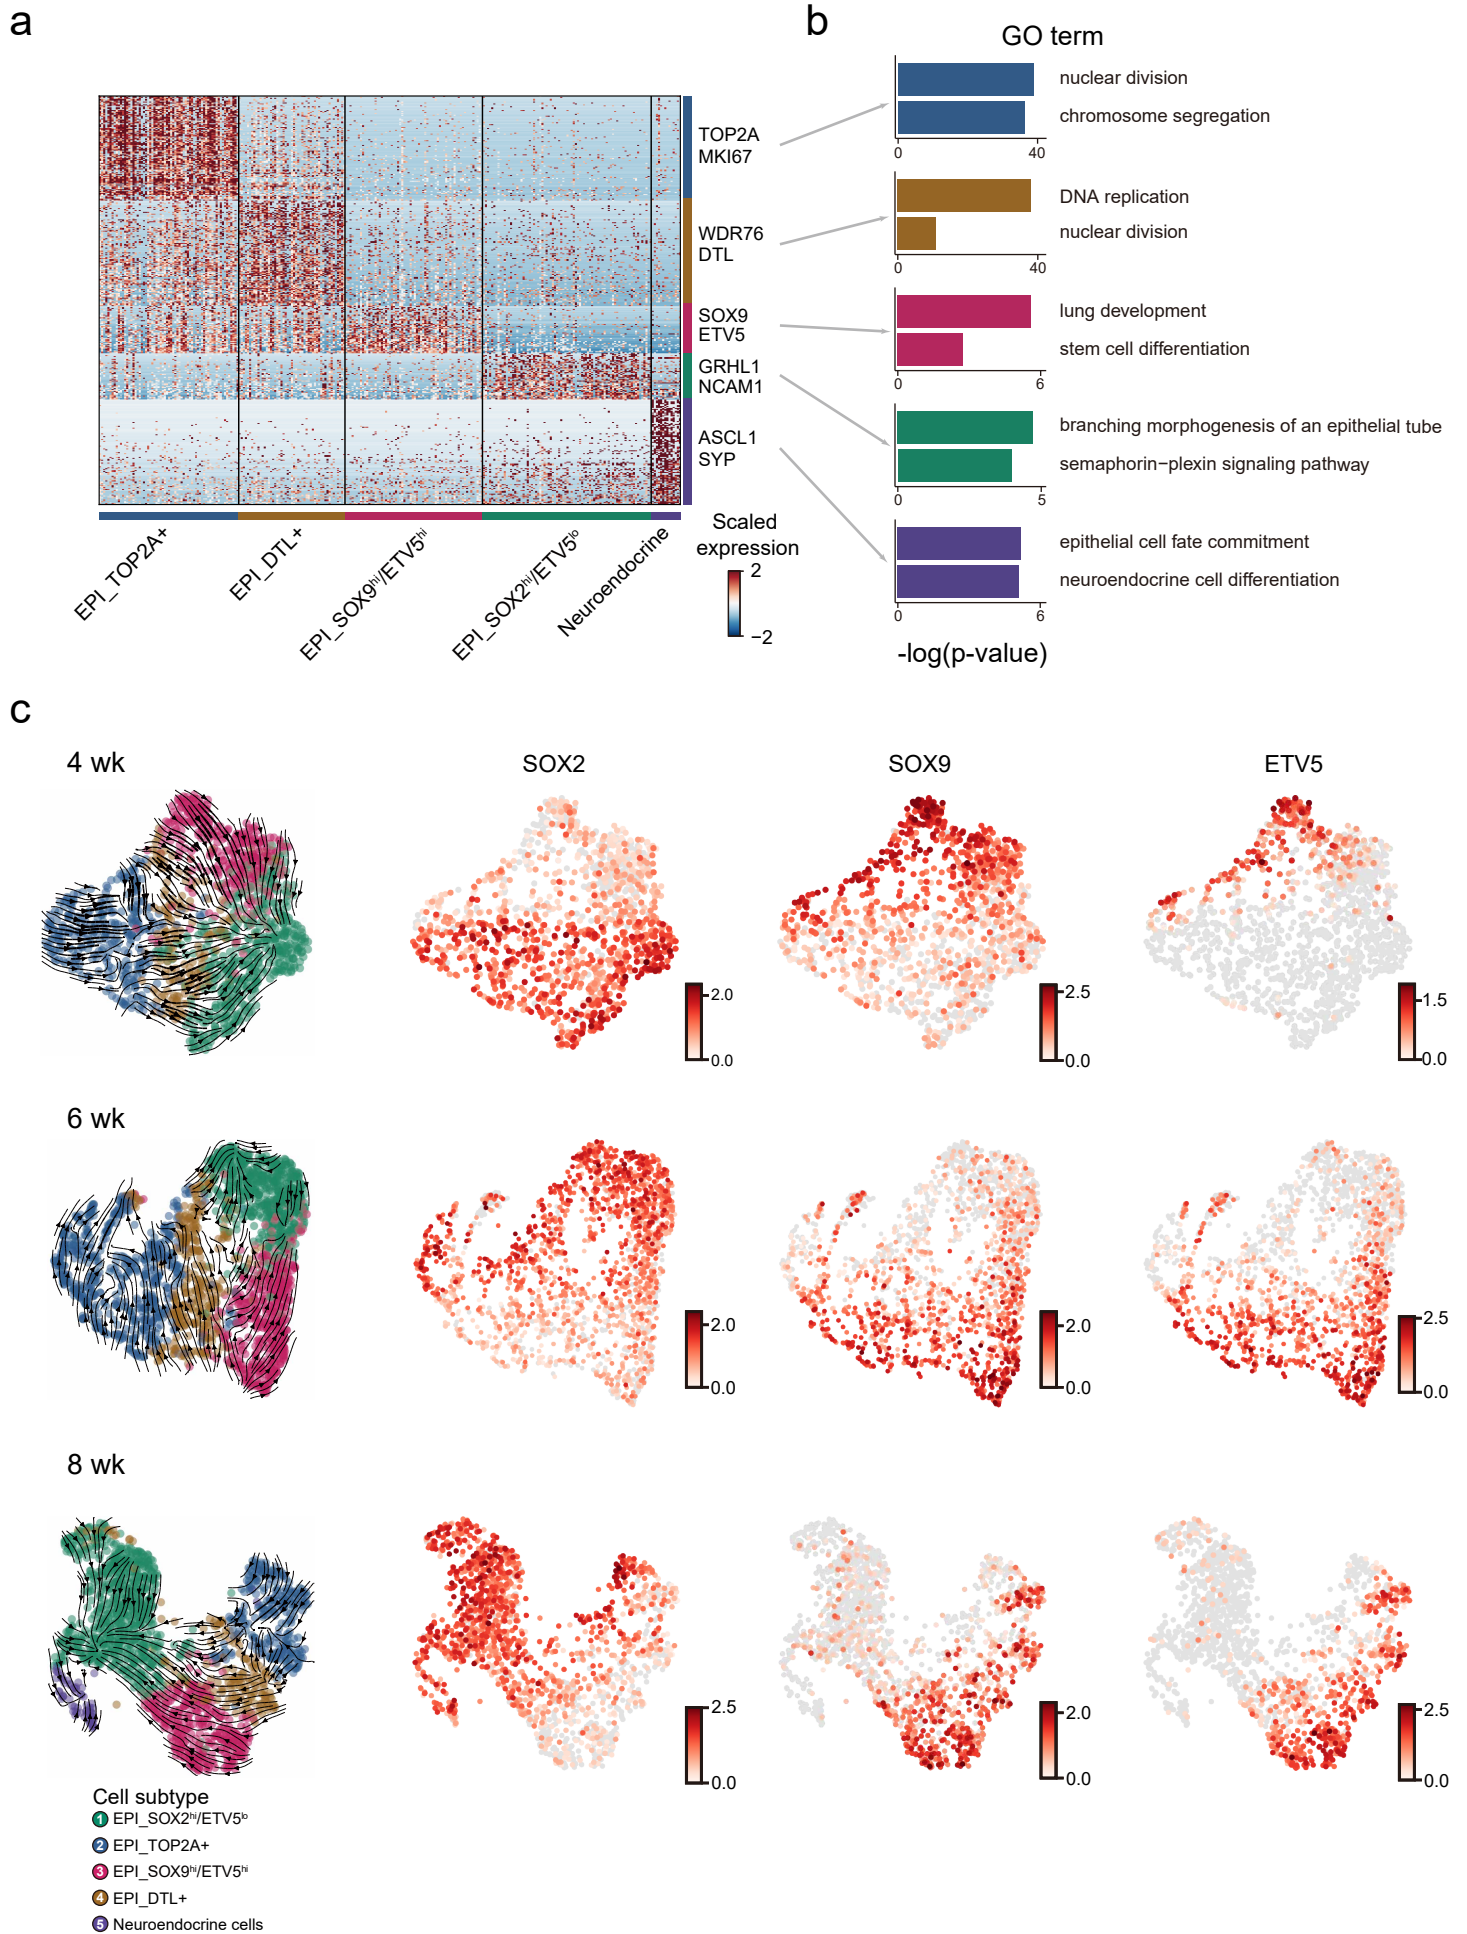

**Fig. S4 Heterogeneity of lung epithelial cells.**

**(a)** Heatmap showing differentially expressed genes of 5 epithelial cell subtypes, with representative genes listing on the right side.

**(b)** Bar plots showing the Gene Ontology (GO) terms of 5 epithelial cell subtypes. GO enrichment was performed using clusterProfiler.

**(c)** UMAP projecting RNA velocity and the expression of *SOX2/SOX9/ETV5* at weeks 4, 6, 8. The cell subtypes were annotated by their markers corresponding to **Fig. S2c**.
