# Supplementary material
Source: PubMed Central journal article supplement (PMC10235101)
Supplement: 41422_2023_802_MOESM8_ESM.pdf [file 41422_2023_802_MOESM8_ESM.pdf]

# Supplementary information, Fig. S8

a

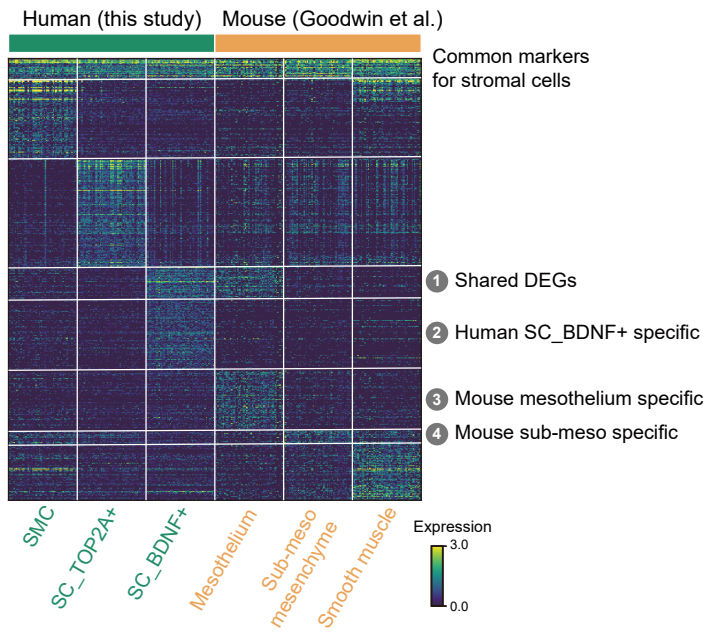

b

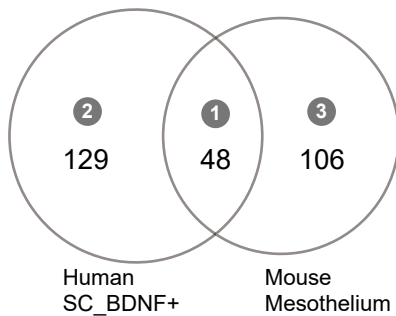

c

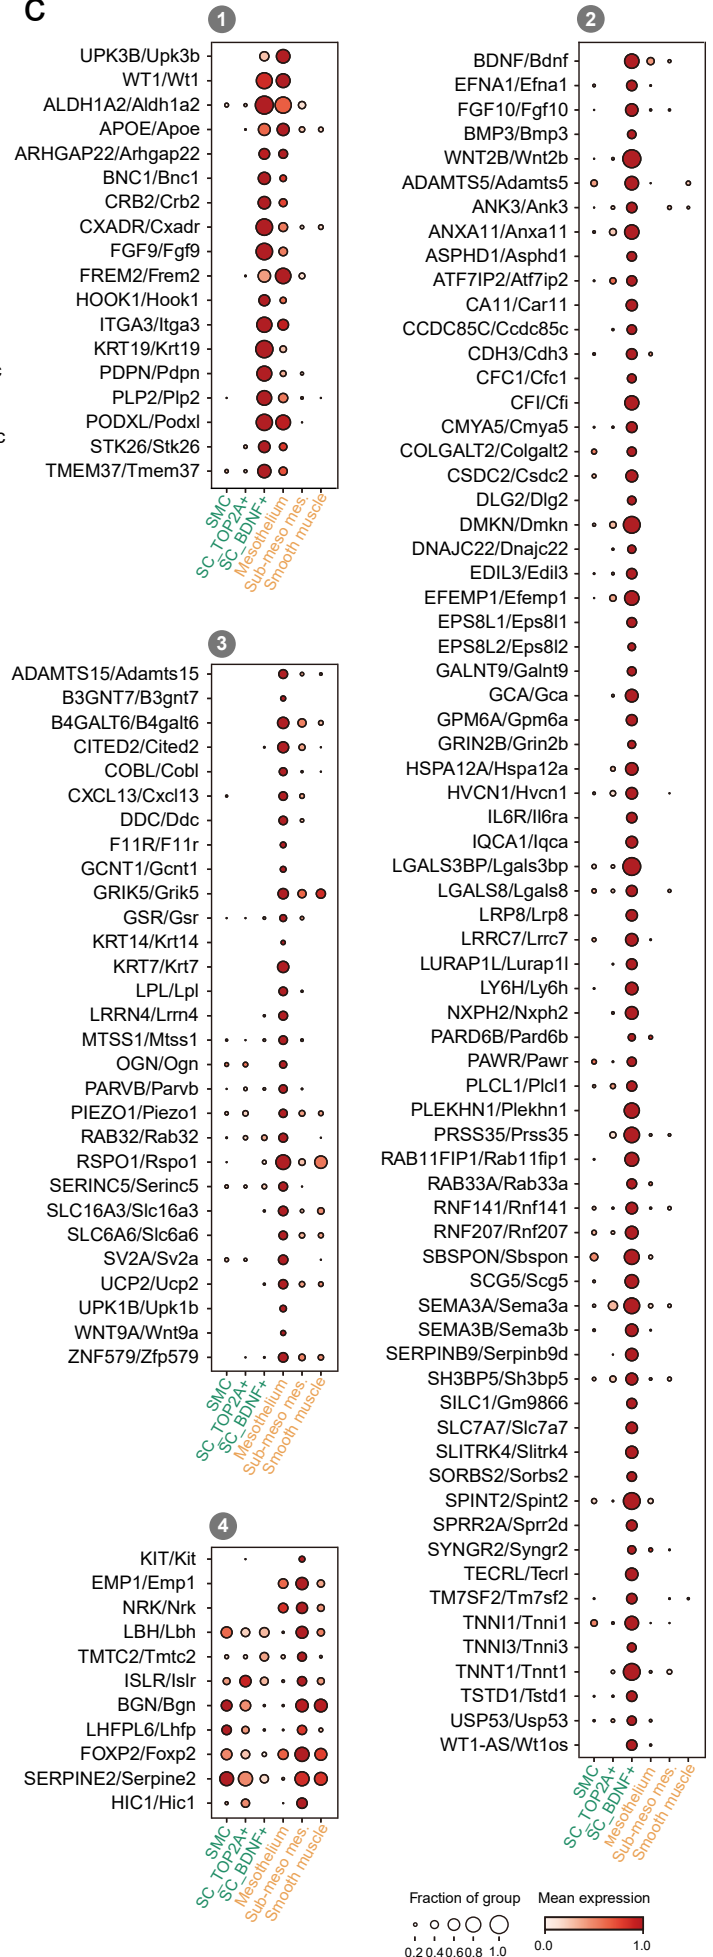

**Fig. S8 Comparison of the human stromal cells and mouse stromal cells.**

**(a)** Heatmap showing the DEGs between human stromal cells (green bar) and mouse stromal cells (orange bar).

**(b)** Venn plot showing the shared and specific DEGs between Human SC\_BDNF+ and Mouse mesothelium.

**(c)** Dot plots showing the gene expression of 'Shared DEGs', 'Human SC\_BDNF+ specific', 'Mouse mesothelium specific' and 'Mouse sub-meso specific' between human stromal cells (green) and mouse stromal cells (orange), respectively. The size and color of each dot represent the expression percentage and average expression level of one marker gene within one cell type, respectively.
