# Supplementary material
Source: PubMed Central journal article supplement (PMC10235101)
Supplement: 41422_2023_802_MOESM9_ESM.pdf [file 41422_2023_802_MOESM9_ESM.pdf]

# Supplementary information, Fig. S9

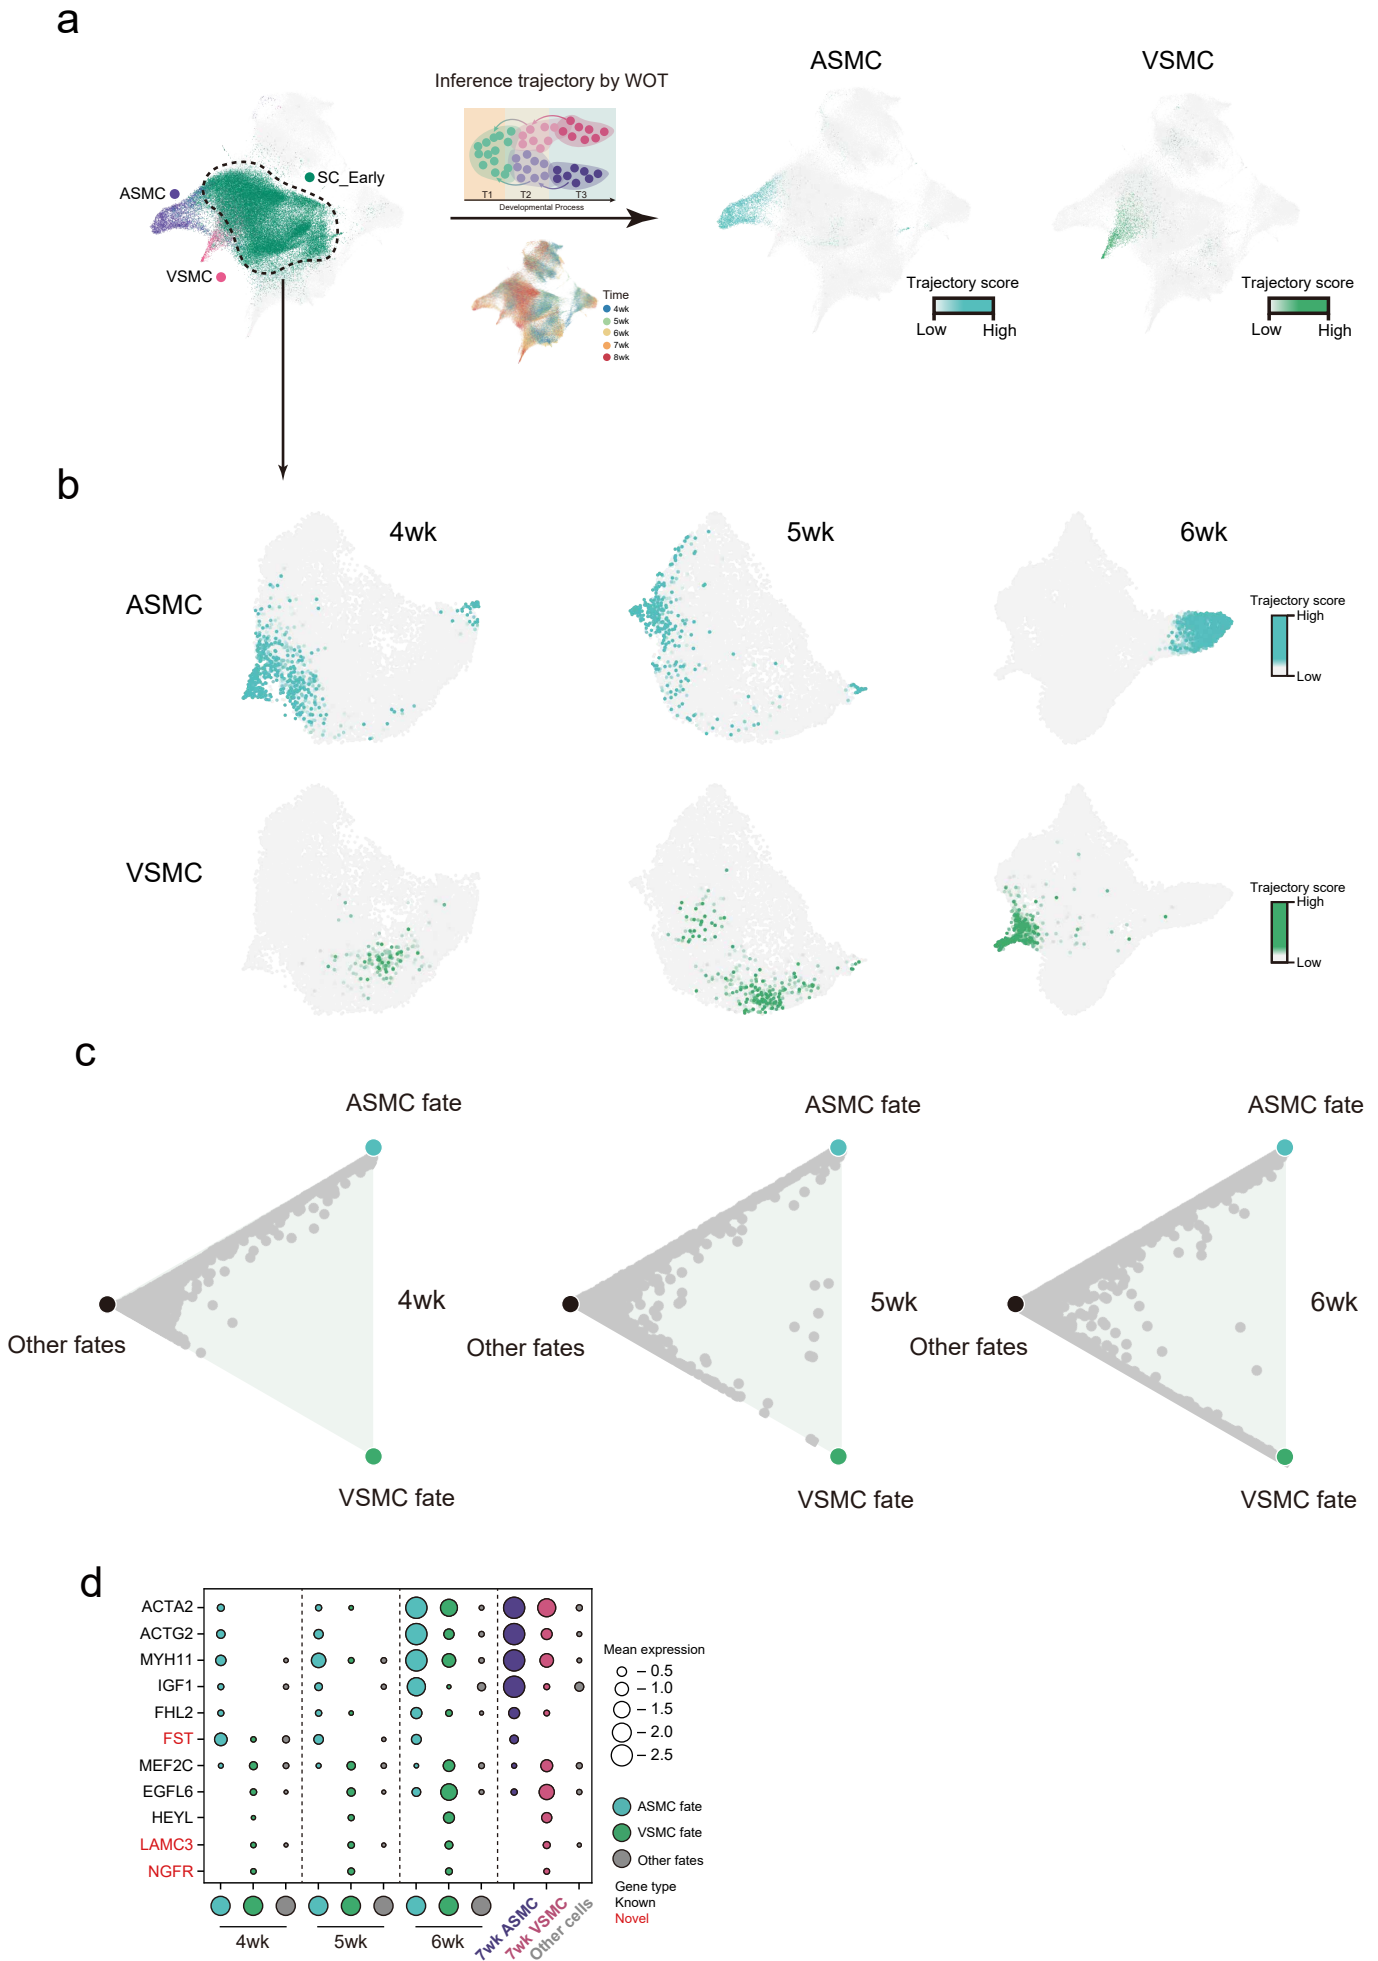

**Fig. S9 Discerning VSMC and ASMC progenitors.**

**(a)** UMAP layout showing stromal cell subtypes (SC\_Early, VSMC and ASMC). WOT was used to predict progenitors and descendants of ASMC and VSMC, indicated by trajectory score. The higher the score of a cell, the more likely the cell is ASMC (blue) or VSMC (green).

**(b)** UMAPs showing the VSMC and ASMC trajectory score in stromal cell subtypes. SC\_Early during weeks 4-6. Colors indicated the trajectory score of ASMC and VSMC.

**(c)** Fate matrix of ASMC and VSMC of weeks 4, 5 and 6. Cells with fate probability were calculated via `tmap_model.fates` implemented in WOT package (see Materials and Methods).

**(d)** Dot plot showing the weighted-sum expression of VSMC and ASMC markers using trajectory score of each time point.
